# Supplementary material for: The essential role of YAP O-GlcNAcylation in high-glucose-stimulated liver tumorigenesis
Source: PubMed Central journal article supplement (PMC5424161; doi:10.1038/ncomms15280), 2017-05-05
Supplement: ncomms15280-s1.pdf [file ncomms15280-s1.pdf]

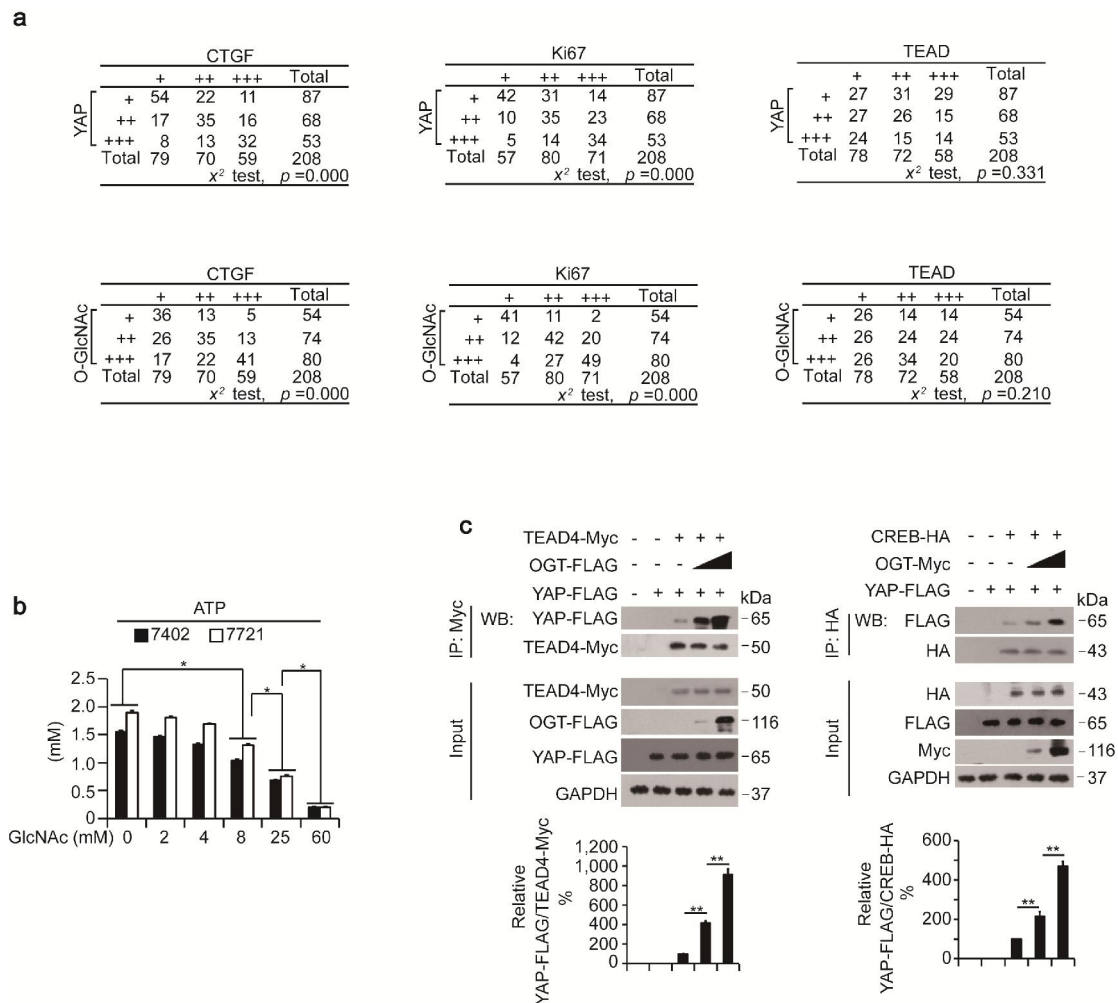

**Supplementary Figure 1. Analysis of the TMA, reduction of intracellular ATP by GlcNAc and induction of YAP binding activities by OGT.**

(a) Analysis of TMA. Data from TMA in Fig. 1a were analyzed by a chi-square test.

(b) GlcNAc reduced ATP at high concentrations. Intracellular ATP from cell lysates ( $1.25 \times 10^6$  cells/100  $\mu$ l lysis buffer) was examined by an ATP testing kit from Beyotime (Haimen, China) in Bel-7402 and SMMC-7721 cells treated with increasing concentrations of GlcNAc as indicated.

(c) OGT facilitated the binding between YAP and TEAD or CREB. In OGT-FLAG or OGT-Myc and YAP-FLAG transfected Bel-7402 cells, TEAD-Myc and CREB-HA was immunoprecipitated with anti-Myc (left) and anti-HA (right) antibodies respectively, followed by Western blot using an anti-FLAG antibody. The relative ratios between YAP-FLAG and TEAD4-Myc or CREB-HA were also shown, and the data from cells co-transfected with YAP-FLAG and TEAD4-Myc or CREB-HA without OGT overexpression are arbitrarily set to 100%.

Representative images are shown, and the data are expressed as the means + SD from three independent experiments. \*,  $p < 0.05$  and \*\*,  $p < 0.01$  indicate statistical significance. The data from Supplementary Fig. 1b-c were analyzed by one-way ANOVA test.

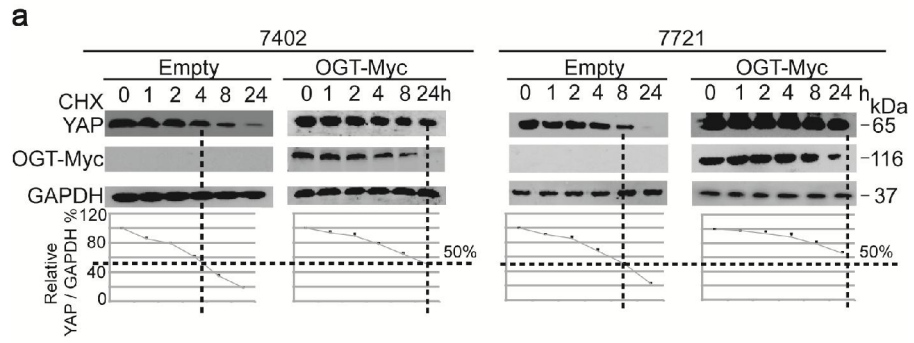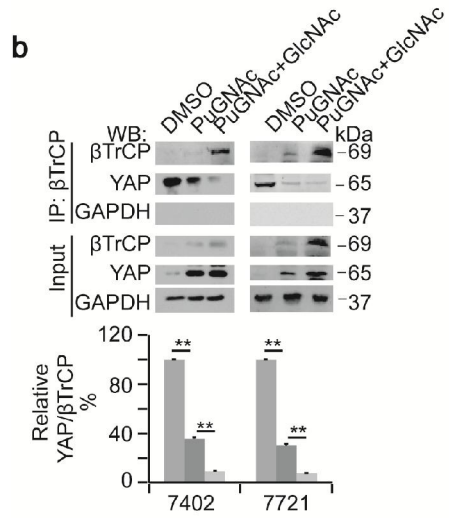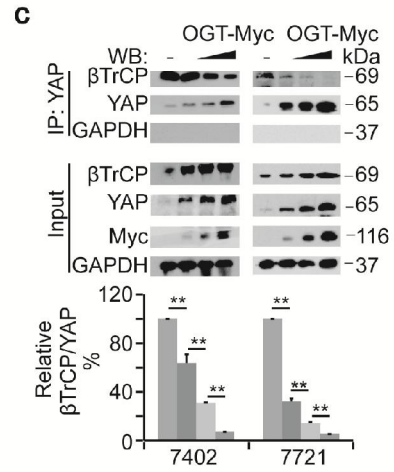

**Supplementary Figure 2. OGT prolongs half-life of YAP through preventing  $\beta$ TrCP interact with YAP.**

(a) OGT overexpression increased YAP stability. Protein synthesis was blocked by treatment with CHX (50  $\mu$ g/ml) for the indicated times. The half-life of endogenous YAP in control and Bel-7402 or SMMC-7721 cells with OGT overexpressed, as measured by Western blot analysis. The levels of YAP were normalized to those of GAPDH, and the 0 h points are arbitrarily set to 100%.

(b) Stimulation of O-GlcNAcylation blocked the interaction between  $\beta$ TrCP and YAP. Bel-7402 and SMMC-7721 cells were treated with DMSO, PuGNac with or without GlcNAc for 24 h.  $\beta$ TrCP was immunoprecipitated by anti- $\beta$ TrCP antibodies, and the associations of YAP were detected by anti-YAP antibodies. The levels of YAP were normalized to those of  $\beta$ TrCP in the IP samples, and the data from cells treated with DMSO are arbitrarily set to 100%.

(c) OGT overexpression blocked the interaction between  $\beta$ TrCP and YAP. Bel-7402 and SMMC-7721 cells were transfected with or without increasing concentrations of OGT expressing plasmids (1–3  $\mu$ g/well of 6-well plate). YAP was immunoprecipitated by anti-YAP antibodies, and the associations of  $\beta$ TrCP were detected by anti- $\beta$ TrCP antibodies. The levels of  $\beta$ TrCP were normalized to those of YAP in the IP samples, and the data from cells without treatments are arbitrarily set to 100%.

Representative images are shown, and the data are expressed as the means + SD from three independent experiments. \*\*,  $p < 0.01$  indicates statistical significance. The data from Supplementary Fig. 2b-c were analyzed by one-way ANOVA test.

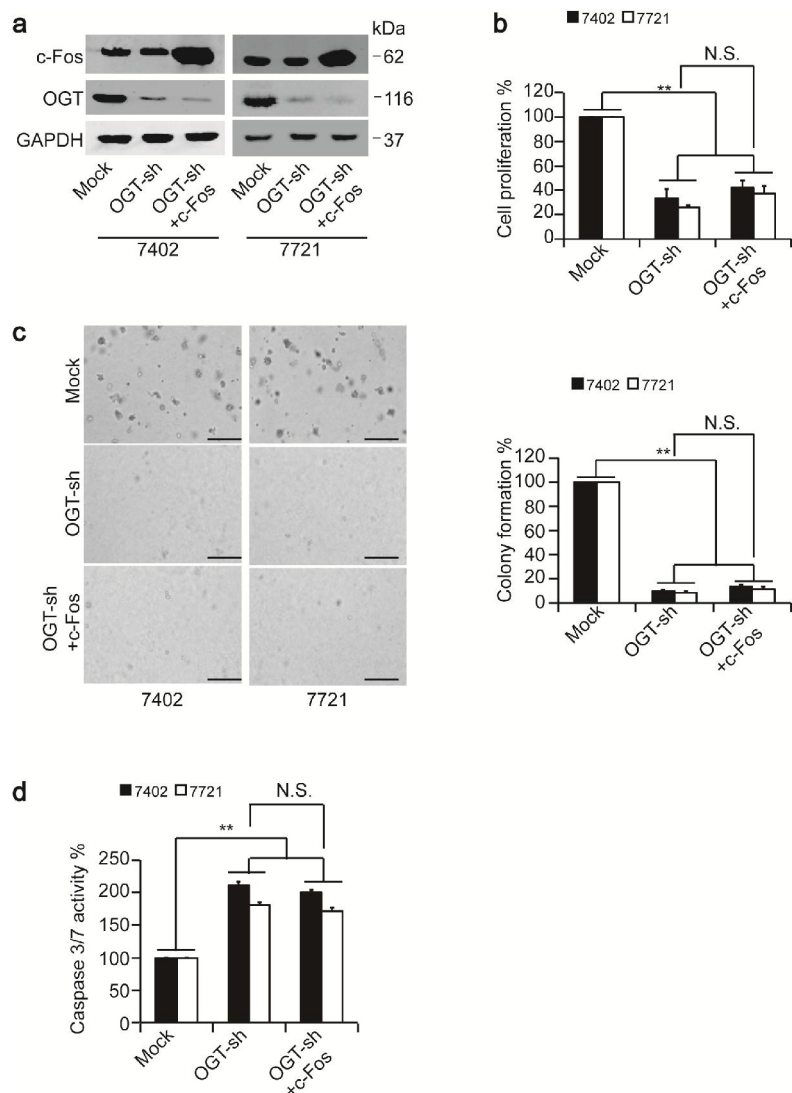

**Supplementary Figure 3. Impaired transformative phenotypes by knocking down OGT cannot be reversed by c-Fos.**

(a) Representative Western blotting images of c-Fos and OGT in control cells, Bel-7402 and SMMC-7721 cells with OGT knocked down with or without simultaneous overexpression of c-Fos.

(b-d) Impaired transformative phenotypes induced by knockdown of OGT could not be affected by overexpression of c-Fos. Cell proliferation, colony formation capacity and Caspase 3/7 activities were measured by an MTT-based assay (b), soft agar colony formation assay (c) and Caspase 3/7 Glo luciferase assay (d) respectively in Bel-7402 and SMMC-7721 cells under different treatments as indicated. Scale bar, 500  $\mu$ m.

The data are shown as the means + SD from three independent experiments. \*\*,  $p < 0.01$  indicates statistical significance. N.S., not significant. The data from Supplementary Fig. 3b-d were analyzed by a one-way ANOVA test. The data from Mock group are arbitrarily set to 100%.

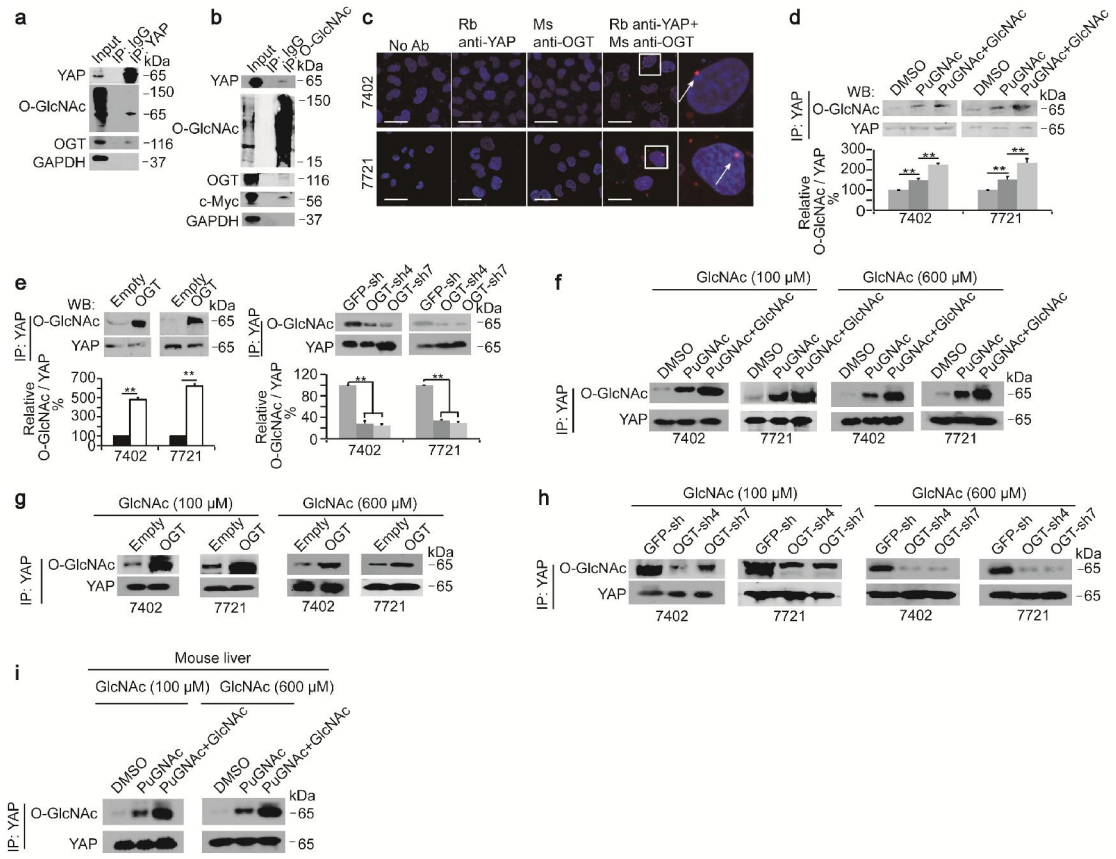

#### **Supplementary Figure 4. O-GlcNAcylation of YAP**

(a-b) Interactions among YAP, O-GlcNAc and OGT. Endogenous YAP (a) and O-GlcNAc (b) were immunoprecipitated by anti-YAP and anti-O-GlcNAc antibodies respectively.

Co-immunoprecipitation of OGT and O-GlcNAc (a) or YAP, OGT and c-Myc (b) were analyzed by western blotting using indicated antibodies in Bel-7402 cells.

(c) The interactions between endogenous YAP and OGT in Bel-7402 and SMMC-7721 cells were measured by a Duolink™ proximity ligation (PLA) kit using anti-YAP and anti-OGT antibodies, as indicated. Parallel negative controls were also analyzed by using indicated antibodies. The areas with red signals were indicated and enlarged by a square. Scale bar, 50  $\mu$ m. The arrows show strong interaction signals. Ms, mouse origin; Rb, rabbit origin.

(d-e) PuGNac, GlcNAc and OGT promoted YAP O-GlcNAcylation. Bel-7402 and SMMC-7721 cells were treated with DMSO, PuGNac (25  $\mu$ M) with or without GlcNAc (4 mM) (d), transfected with OGT-expressing plasmid or infected with OGT-sh (e). Endogenous YAP was immunoprecipitated by an anti-YAP antibody. Co-immunoprecipitation of O-GlcNAc was analyzed using an anti-O-GlcNAc antibody. The O-GlcNAc levels of YAP were normalized to the YAP, and the data from the control group (treated with either DMSO, empty vectors or GFP-sh) are arbitrarily set to 100%.

(f-h) Detection of O-GlcNAcylation of YAP by RL2 antibodies in cells maintained under low or high GlcNAc concentrations. PuGNac, GlcNAc and OGT promoted YAP O-GlcNAcylation in human liver cancer cells. Bel-7402 and SMMC-7721 cells were maintained under either low (100  $\mu$ M) or high concentrations (600  $\mu$ M) of GlcNAc before and during treating with DMSO, PuGNac (25  $\mu$ M) with or without additional GlcNAc (4 mM) (f), infected with OGT-expressing plasmid (g) or indicated OGT-sh (h). Endogenous YAP was immunoprecipitated by an anti-YAP antibody. Co-immunoprecipitation of O-GlcNAc was analyzed using an anti-O-GlcNAc antibody (RL2).

(i) PuGNac and GlcNAc stimulated O-GlcNAcylation of YAP in mouse liver. Primary hepatocytes that obtained from 5-week Balb/c male mice were cultured in either 100 or 600  $\mu$ M GlcNAc for 24 h before treating with DMSO, PuGNac (25  $\mu$ M) with or without additional GlcNAc (4 mM). Endogenous YAP was immunoprecipitated by an anti-YAP antibody. Co-immunoprecipitation of O-GlcNAc was analyzed using an anti-O-GlcNAc antibody (RL2). Representative images are shown, and the data are expressed as the means + SD from three independent experiments. \*\*,  $p < 0.01$  indicates statistical significance. The data from Supplementary Fig. 4d and 4e (right panel) were analyzed by a one-way ANOVA test. The

data from Supplementary Fig. 4e (left panel) were analyzed by a Student's t-test.

**YAP1\_HUMAN**      1496 Transcriptional coactivator YAP1 OS=Homo sapiens GN=YAP1 DS=1 SV=2

| Score | Mass  | Matches | Sequences | enPAT                                                                   |
|-------|-------|---------|-----------|-------------------------------------------------------------------------|
| 1496  | 34484 | 64(51)  | 11(7)     | 1.71 Transcriptional coactivator YAP1 OS=Homo sapiens GN=YAP1 DS=1 SV=2 |

▼ 64 peptide matches (17 non-duplicate, 47 duplicate)

| Query Dupes | Observed  | Mr(expt)  | Mr(theo)  | ppm   | M | Score | Expect   | Rank | O | Peptide                                                           |
|-------------|-----------|-----------|-----------|-------|---|-------|----------|------|---|-------------------------------------------------------------------|
| 3573 ▶6     | 626.3376  | 1260.8605 | 1260.8647 | 4.85  | 1 | 46    | 0.00033  | ▶1   | E | R.LDGGKFLNTL-                                                     |
| 5669 ▶7     | 510.6289  | 1028.8325 | 1028.8289 | 3.93  | 1 | 29    | 0.04     | ▶1   | E | R.HLDCRFFKPFK.S                                                   |
| 7396 ▶9     | 909.3958  | 1816.7755 | 1816.7785 | -7.47 | 0 | 115   | 1.9e-011 | ▶1   | E | R.GSDCTDGLASVETVLT                                                |
| 8075 ▶3     | 915.9513  | 1849.8886 | 1849.9040 | -7.89 | 0 | 97    | 7.3e-009 | ▶1   | E | R.GSDCTDGLASVETVLT                                                |
| 8077 ▶3     | 650.9723  | 1299.8952 | 1299.9040 | -7.67 | 0 | 78    | 9.9e-007 | ▶1   | E | R.GSDCTDGLASVETVLT                                                |
| 8526 ▶1     | 1617.8914 | 3033.9543 | 3033.9595 | -2.57 | 0 | 65    | 7.2e-006 | ▶1   | E | R.VFLAKCTQTTFKPR.K                                                |
| 8532 ▶11    | 676.9939  | 2033.9599 | 2033.9595 | -0.15 | 0 | 89    | 2e-007   | ▶1   | L | R.VLILALQTTTWFQPR.K                                               |
| 9569        | 1109.6195 | 2216.6245 | 2216.6460 | -9.68 | 0 | 53    | 0.00025  | ▶1   | L | R.QSEPLPLDVELADMERAK.L                                            |
| 9570        | 740.0217  | 2217.6432 | 2216.6460 | 450   | 0 | 18    | 0.029    | ▶1   | L | R.QSEPLPLDVELADMERAK.L                                            |
| 11276       | 919.6645  | 2732.3115 | 2735.3063 | 1.18  | 0 | 22    | 0.038    | ▶1   | L | R.SQLPDLQSGGFRNFSFDRSDEL.L                                        |
| 11285 ▶2    | 924.7721  | 2771.3005 | 2771.3032 | -0.98 | 0 | 65    | 4e-006   | ▶1   | L | R.SQLPDLQSGGFRNFSFDRSDEL.L - Oxidation (M)                        |
| 12693 ▶2    | 1680.1484 | 3237.4143 | 3237.4368 | -6.92 | 0 | 34    | 0.0048   | ▶1   | E | R.TPDDFASVQCHTGGITSLPSQNS.F                                       |
| 13511 ▶4    | 887.6888  | 3533.8459 | 3533.8591 | -3.73 | 0 | 91    | 8.6e-009 | ▶1   | E | R.AHSFASLGLAVSGTLLTGGVSGPAAITDQLR.G                               |
| 13524 ▶8    | 707.7769  | 3533.8459 | 3533.8591 | -3.14 | 0 | 10    | 0.00018  | ▶1   | E | R.AHSFASLGLAVSGTLLTGGVSGPAAITDQLR.G                               |
| 13653 ▼1    | 1113.8746 | 3562.4869 | 3560.4513 | 366   | 0 | 39    | 0.0012   | ▶1   | E | R.AHSFASLGLAVSGTLLTGGVSGPAAITDQLR.G + GLCNAE (S7) - Oxidation (M) |
| 13654       | 1113.8746 | 3562.4869 | 3560.4513 | 369   | 0 | 431   | 0.0033   | ▶1   | E | R.AHSFASLGLAVSGTLLTGGVSGPAAITDQLR.G + GLCNAE (S7) - Oxidation (M) |
| 13663       | 1397.4406 | 3563.7331 | 3563.7690 | -6.43 | 0 | 19    | 0.02     | ▶1   | E | M.DPGQFPDFAPGQSGQGGQQGGGGPSSFGQAPAAQDQAPADPAGGQIVHVR.G            |
| 13664       | 1118.1553 | 3563.7402 | 3563.7690 | -3.19 | 0 | 16    | 0.03     | ▶1   | E | M.DPGQFPDFAPGQSGQGGQQGGGGPSSFGQAPAAQDQAPADPAGGQIVHVR.G            |

**Supplementary Figure 5. Mascot search results for mass spectrum.**

(a) Mascot search result for Nano-LC-QTOF-MS analysis of an in-gel YAP trypsin digest. By using the Swiss-Prot database, O-GlcNAcylation of YAP at Thr241 was identified.



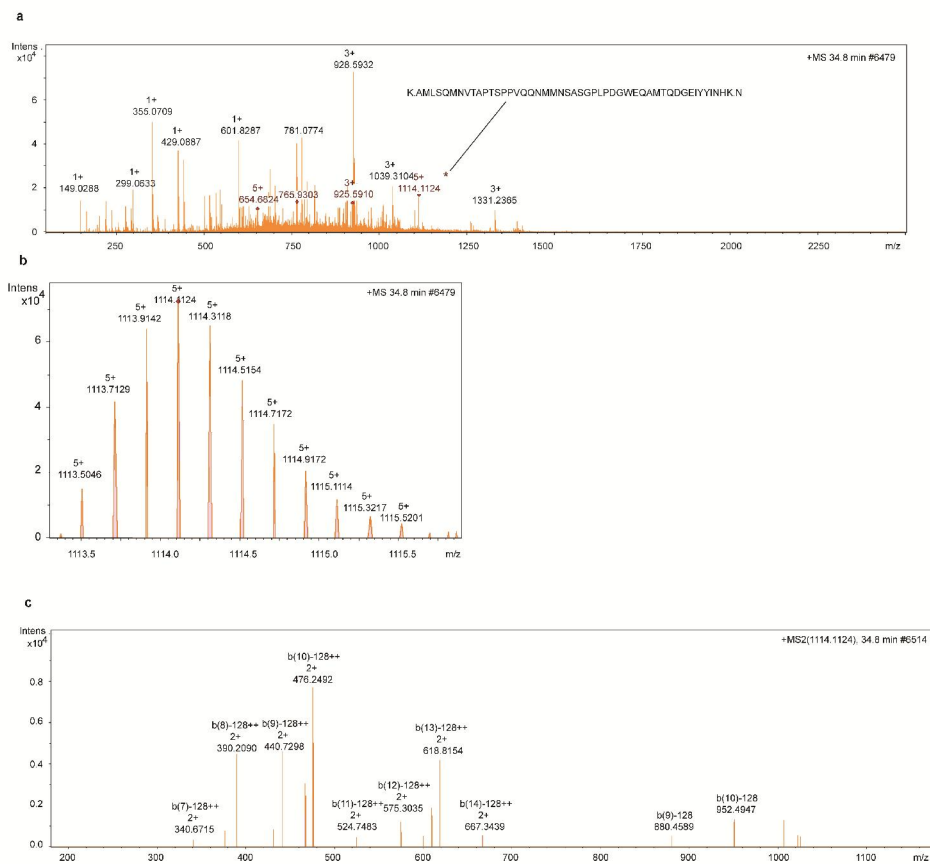

**Supplementary Figure 6. The O-GlcNAcylated YAP peptide (#13653) in mass spectrum.**

(a) Mass spectrum of in-gel YAP trypsin digest. m/z 0-2500, 34.8 min. The O-GlcNAcylated peptide is indicated by an asterisks (\*).

(b) The isotope peak of O-GlcNAcylated peptide #13653 in mass spectrum. m/z 1113.50-1115.75, 34.8 min.

(c) Mass spectrum of O-GlcNAcylated peptide #13653. m/z 200-1160, 34.8min. The Neutral loss of each Oxidation is -64.

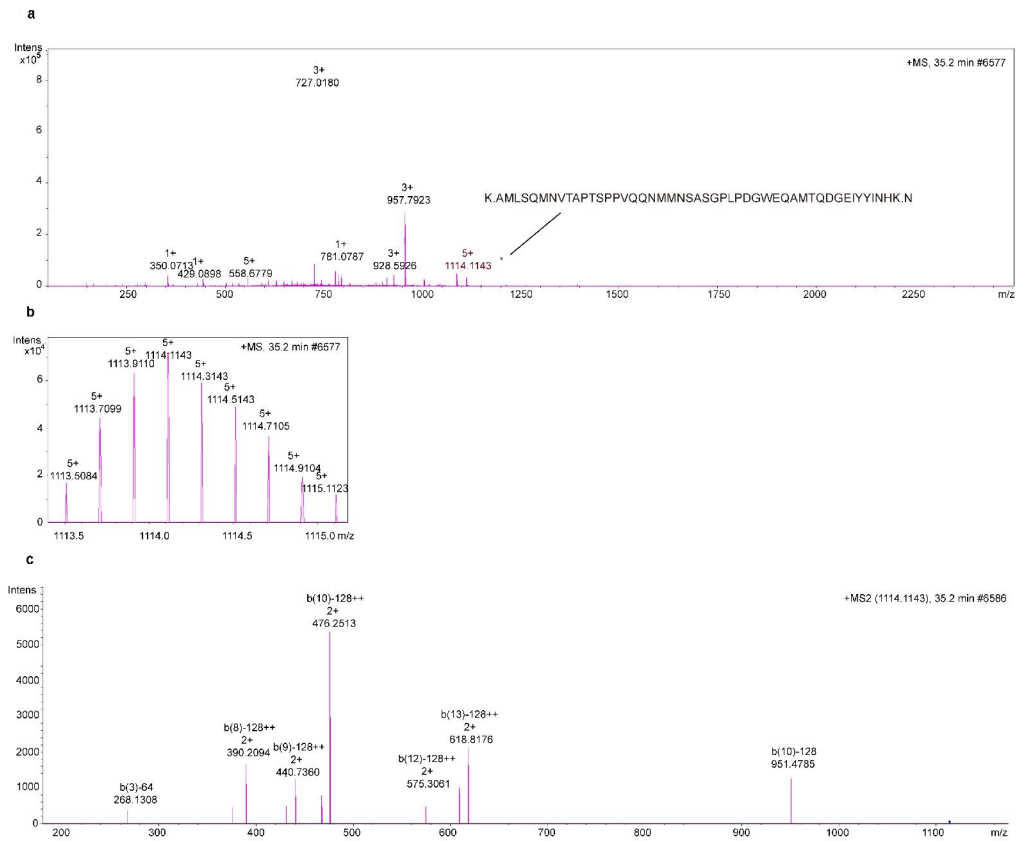

**Supplementary Figure 7. The O-GlcNAcylated YAP peptide (#13654) in mass spectrum.**

(a) Mass spectrum of in-gel YAP trypsin digest. m/z 0-2500, 35.2 min. The O-GlcNAcylated peptide is indicated by an asterisks (\*).

(b) The isotope peak of O-GlcNAcylated peptide #13654 in mass spectrum. m/z 1113.5-1115.2, 35.2 min.

(c) Mass spectrum of O-GlcNAcylated peptide #13654. m/z 200-1160, 35.2 min. The Neutral loss of each Oxidation is -64.

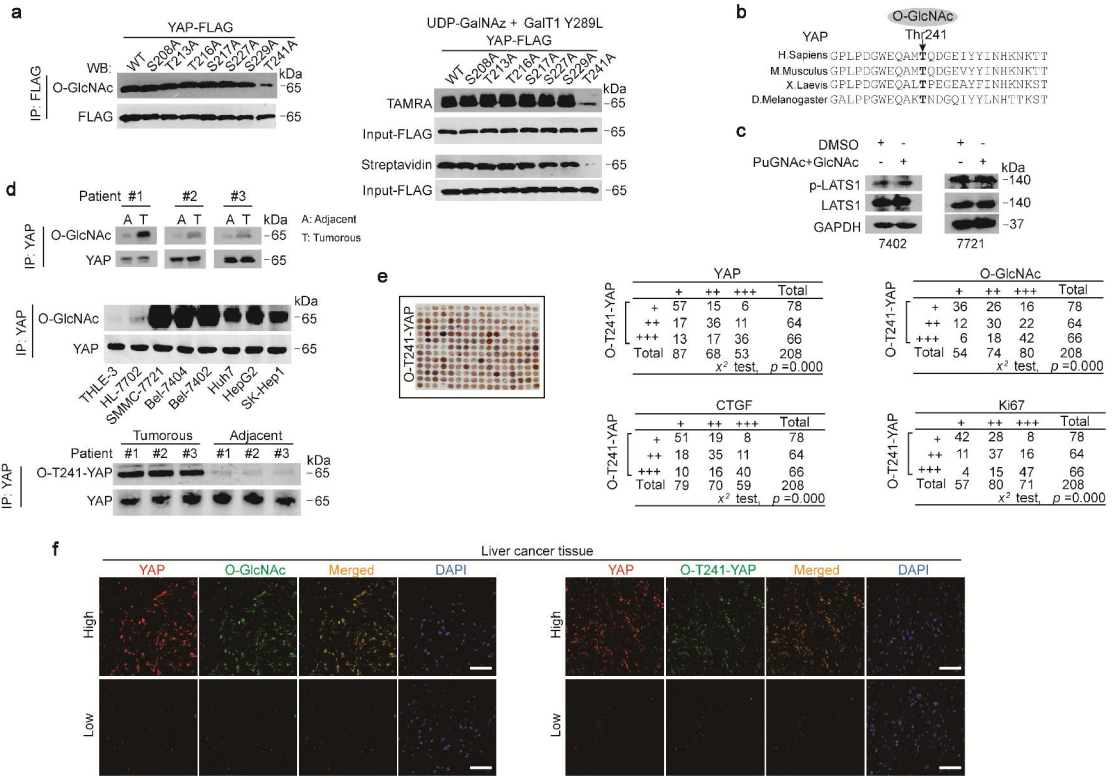

**Supplementary Figure 8. YAP is O-GlcNAcylated at Thr241 and O-GlcNAcylation of YAP is high in liver cancer tissues and established liver cancer cell lines.**

(a) The YAP-FLAG (either WT or indicated mutant) expressing plasmids were transfected into Bel-7402 cells. Exogenous YAP-FLAG was immunoprecipitated by an anti-FLAG antibody. Co-immunoprecipitation of O-GlcNAc was analyzed using an anti-O-GlcNAc antibody (left panel). O-GlcNAcylation of exogenous YAP-FLAG (either WT or indicated mutant) was measured via anti-TAMRA antibodies (upper) and HRP labeled-Streptavidin (lower) respectively in Bel-7402 cells by enzymatic labeling of O-GlcNAc sites experiments (right panel).

(b) Comparison of amino acids sequences around the O-GlcNAc site within YAP proteins among Homo sapiens (Thr241), Mus musculus, Xenopus laevis and Drosophila melanogaster.

(c) p-LATS1 and total-LATS1 in Bel-7402 and SMMC-7721 cells under treatment of DMSO or PuGNac with GlcNA, as measured by Western blotting.

(d) O-GlcNAcylation of YAP in liver cancer tissues and established cell lines. Endogenous YAP was immunoprecipitated by an anti-YAP antibody in liver cancer and its paired adjacent normal liver tissue (upper and lower panels) as well as in indicated established liver cancer cell (i.e. SMMC-7721, Bel-7404, Bel-7402, Huh7, HepG2 and SK-Hep1) and hepatocyte (THLE-3 and HL-7702) lines (middle panel). Co-immunoprecipitation of O-GlcNAc was analyzed using an anti-O-GlcNAc antibody (upper and middle panels) and an anti-O-T241-YAP antibody (lower panel), respectively.

(e) TMA using anti-O-T241-YAP antibodies. Data from O-T241-YAP (Fig. S4q), total-YAP (Fig. 1a), global O-GlcNAcylation (O-GlcNAc, Fig. 1a), CTGF (Fig. 1a) and Ki67 (Fig. 1a) were analyzed by a chi-square test.

(f) Subcellular localization of YAP, O-GlcNAc and O-T241-YAP in liver cancer tissue, as measured by IF experiment. Scale bar, 500  $\mu$ M. The representative IF images of liver cancer tissues from 12 independent patients are shown. High and low indicates YAP has relative higher or lower levels in different liver cancer tissues.

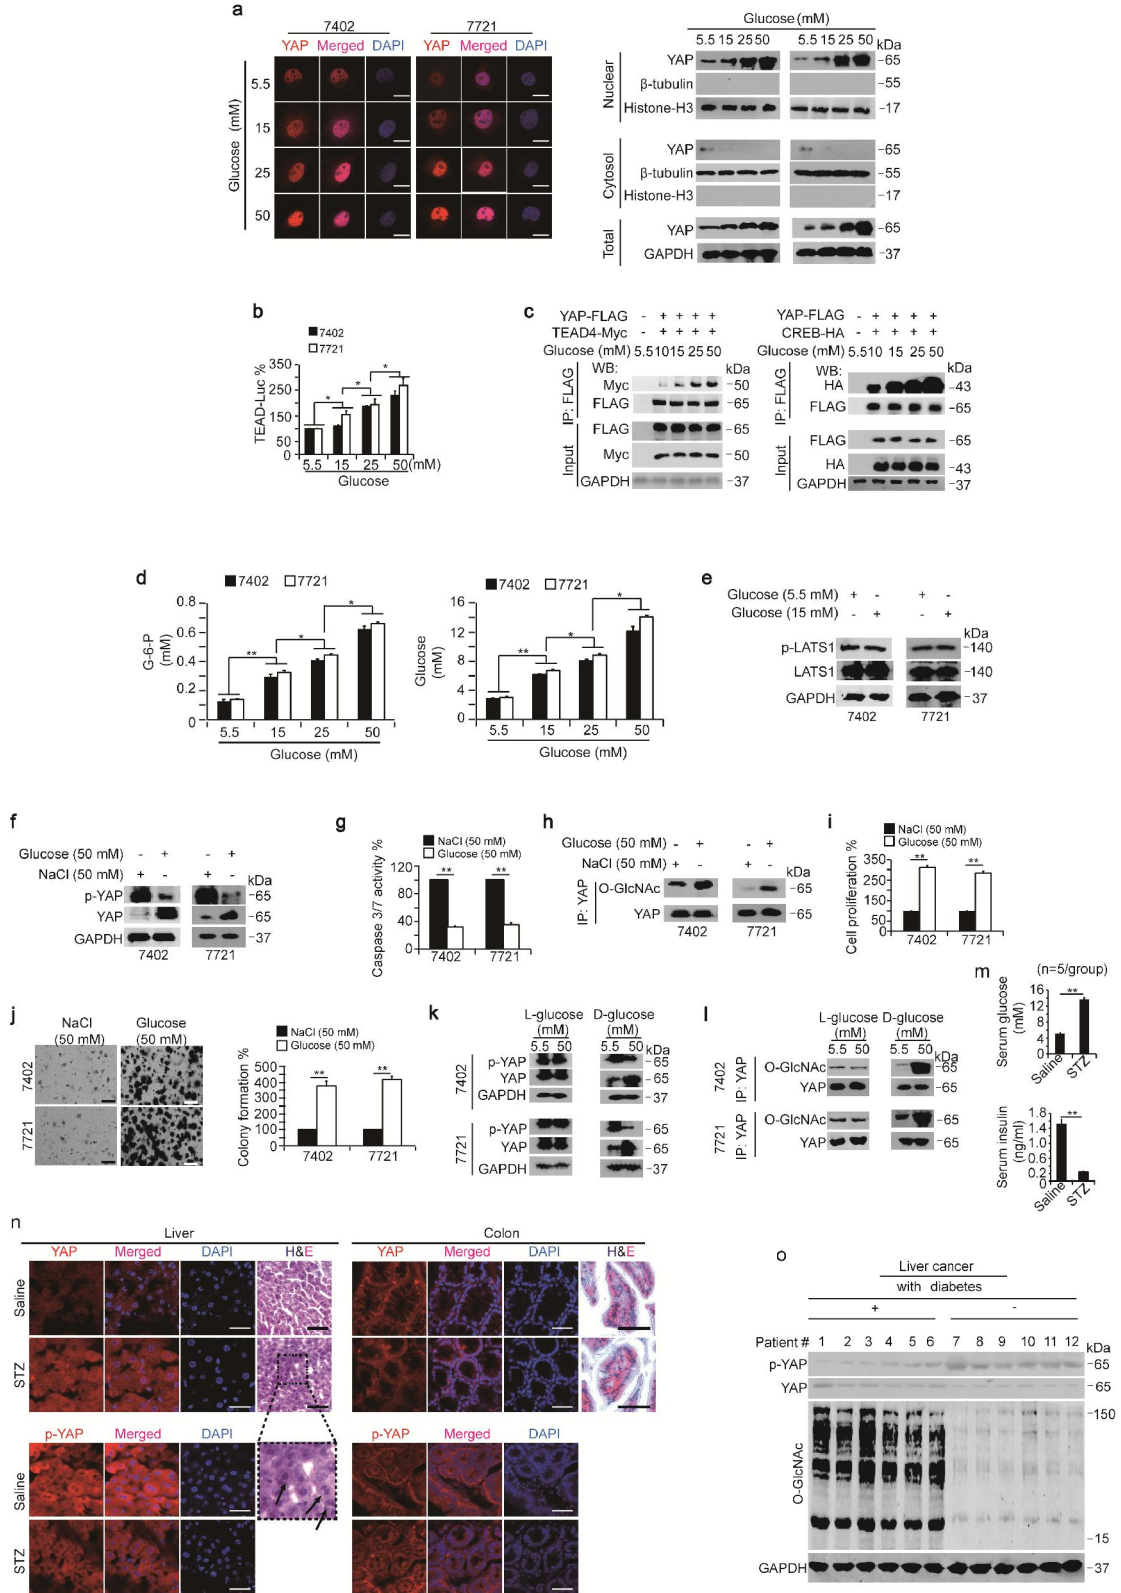

### **Supplementary Figure 9. Glucose stimulates YAP.**

(a) Glucose stimulated nuclear accumulation of YAP, as measured by a confocal microscopy assay. Bel-7402 and SMMC-7721 cells were treated with glucose at indicated concentrations for 24 h before harvest for examination. Scale bar, 20  $\mu\text{m}$  (left). The nuclear and cytosol components of cells were prepared by a nuclear extract kit (Active motif, Carlsbad, CA, USA) in Bel-7402 cells treated with indicated increasing concentrations of glucose. The levels of YAP were subsequently examined by WB (right).

(b) Bel-7402 and SMMC-7721 cells harboring pUAS-LUC/TEAD-Gal4 system were cultured in media containing indicated concentrations of glucose for 24 h, and cellular luciferase activity was subsequently measured. The data from cells treated with 5.5 mM glucose are arbitrarily set to 100%.

(c) Glucose facilitated the binding between YAP and TEAD or CREB. Bel-7402 cells were transfected with YAP-FLAG and TEAD4-Myc or CREB-HA, and cultured in media containing indicated concentrations of glucose for 24 h. YAP-FLAG was immunoprecipitated by an anti-FLAG antibody, followed by Western blotting analysis of TEAD4-Myc or CREB-HA.

(d) Bel-7402 and SMMC-7721 cells were treated with indicated increasing concentrations of glucose. Cell lysates ( $1.25 \times 10^6$  cells/100  $\mu\text{l}$  lysis buffer) were harvested and examined for intracellular G-6-P and glucose.

(e) p-LATS1 and total-LATS1 in Bel-7402 and SMMC-7721 cells under treatment of indicated concentration of glucose, as measured by Western blotting.

(f) Western blots of p-YAP and YAP in Bel-7402 and SMMC-7721 cells treated with 50 mM glucose or NaCl.

(g) Caspase activities were measured by a Caspase 3/7 Glo luciferase assay in Bel-7402 and SMMC-7721 cells treated with 50 mM glucose or NaCl. The data from cells treated with NaCl (50 mM) are arbitrarily set to 100%.

(h) O-GlcNAcylation of YAP. Bel-7402 and SMMC-7721 cells were treated with 50 mM glucose or NaCl. Endogenous YAP was immunoprecipitated by an anti-YAP antibody and Co-immunoprecipitation of O-GlcNAc was analyzed using an anti-O-GlcNAc antibody.

(i-j) Cell proliferation and colony formation capacities were measured by an MTT-based assay (i) and soft agar colony formation assay (j). The data from cells treated with NaCl (50 mM) are arbitrarily set to 100%.

(k) Western blots of p-YAP and YAP in Bel-7402 and SMMC-7721 cells treated with indicated

concentrations of L-glucose or D-glucose.

(l) O-GlcNAcylation of YAP in Bel-7402 and SMMC-7721 cells treated with indicated concentrations of L-glucose or D-glucose. Endogenous YAP was immuno-precipitated by anti-YAP antibodies and O-GlcNAcylation of YAP was detected by anti-O-GlcNAc antibodies.

(m) Serum-glucose and serum-insulin in mice treated with saline or STZ. N=5 per group.

(n) YAP and p-YAP were detected in the liver and colon from saline- and STZ-treated mice by confocal microscopic assay. The tissues were also stained by H&E. Arrows indicate dividing cells. Scale bar, 100  $\mu$ m.

(o) p-YAP, total-YAP and global cellular O-GlcNAcylation in liver cancer tissues from patients complicated with diabetes or not.

Representative images are shown, and the data are expressed as the means + SD from three independent experiments. \*,  $p < 0.05$  and \*\*,  $p < 0.01$  indicate statistical significance. The data from Supplementary Fig. 9b and 9d were analyzed by a one-way ANOVA test, and the data from Supplementary Fig. 9g, 9i-9j and 9m were analyzed by a Student's t-test.

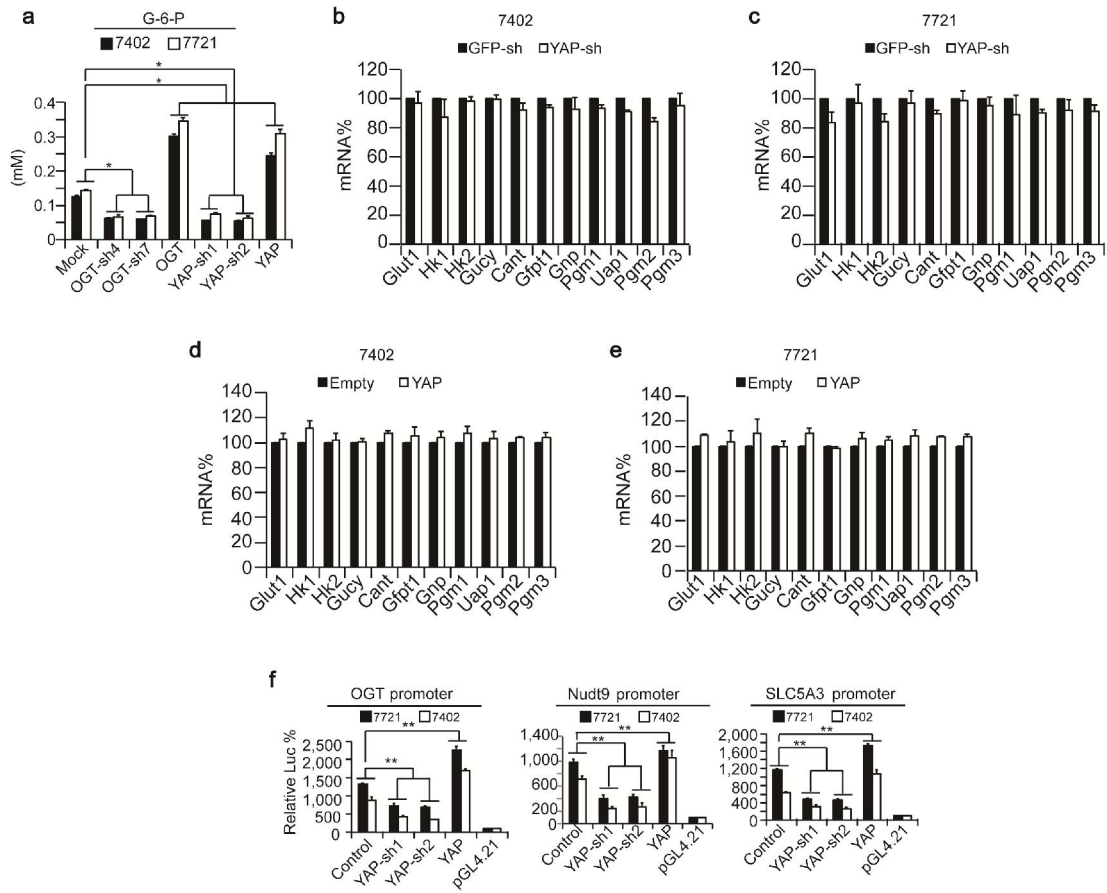



**Supplementary Figure 10. YAP increases intracellular G-6-P and transcription of HBP genes.**

(a) YAP and OGT up-regulated intracellular G-6-P. Cell lysates ( $1.25 \times 10^6$  cells/100  $\mu$ l lysis buffer) were harvested and intracellular G-6-P was examined by a kit from Sigma in control (Mock, without any treatment) and Bel-7402 or SMMC-7721 cells with OGT/YAP knocked down or overexpressed.

(b-c) The mRNA levels of genes as indicated in control and Bel-7402 cells (b) or SMMC-7721 cells (c) with YAP knocked down. The data from "GFP-sh" are arbitrarily set to 100%.

(d-e) The mRNA levels of genes as indicated in control and Bel-7402 cells (d) or SMMC-7721 cells (e) with YAP overexpressed. The data from "empty vectors" are arbitrarily set to 100%.

(f) Bel-7402 or SMMC-7721 cells were transfected with expressing plasmids as indicated. Promoter activities of *OGT*, *Nudt9* and *SLC5A3* genes were measured by a dual luciferase analysis. The data from pGL4.21 are arbitrarily set to 100%.

The data are shown as the means + SD from three independent experiments. \*,  $p < 0.05$  and \*\*,  $p < 0.01$  indicate statistical significance. The data from Supplementary Fig. 10a and 10f were analyzed by a one-way ANOVA test. The data from Supplementary Fig. 10b-e were analyzed by a Student's t-test.

**a** Tumorous Adjacent  
Patient #1 2 3 1 2 3

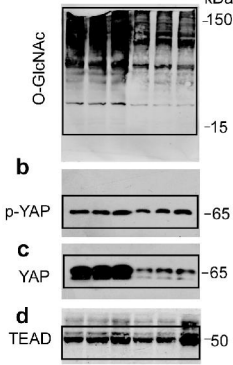

Original blots for Fig. 1d

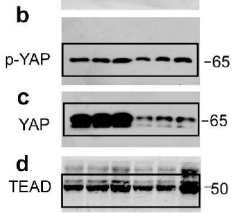

Original blots for Fig. 1d

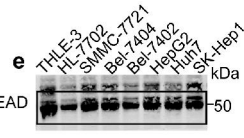

Original blots from Fig. 1f

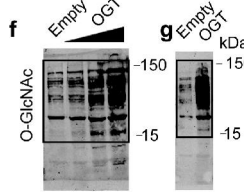

Original blots for Fig. 2d

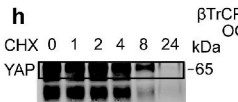

Original blots for Fig. 3a

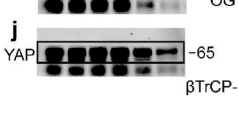

Original blots for Fig. 3a

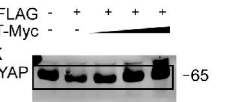

Original blots for Fig. 3c

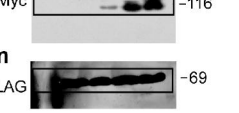

Original blots for Fig. 3c

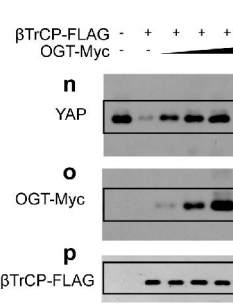

Original blots for Fig. 3c

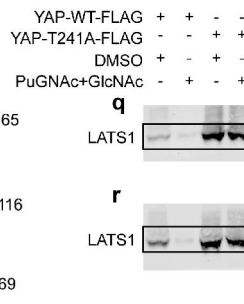

Original blots for Fig. 5d

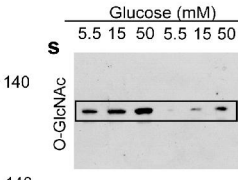

Original blots for Fig. 6c

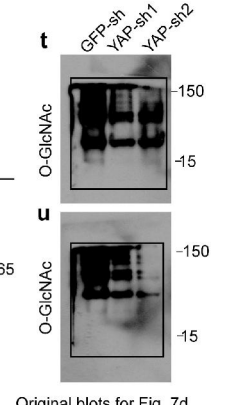

Original blots for Fig. 7d

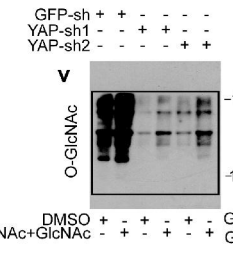

Original blots for Fig. 7e

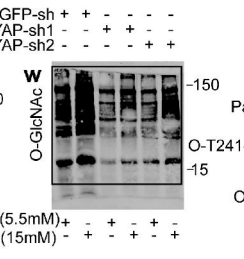

Original blots for Fig. 7e

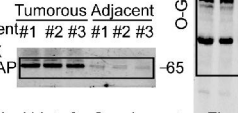

Original blots for Supplementary Fig. 8d

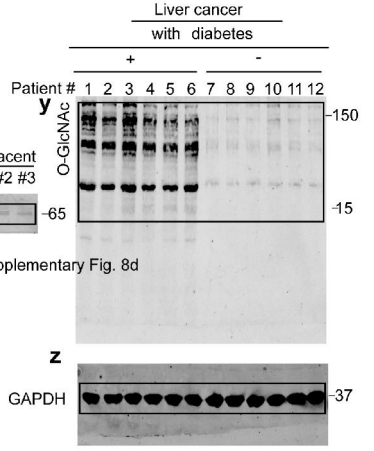

Original blots for Supplementary Fig. 9a

### **Supplementary Figure 11. Represented images of original blots**

(a-d) Western blots of O-GlcNAc (a), p-YAP (b), YAP (c) and TEAD (d) in liver cancer and adjacent normal liver tissues. The O-GlcNAc (a), p-YAP (b), YAP (c) and TEAD (d) blots in the box rectangles were presented in Fig. 1d.

(e) TEAD expression established hepatocyte (THLE-3 and HL-7702) and the indicated liver cancer cell lines. The TEAD blot in the box rectangles was presented in Fig. 1e.

(f-g) Overexpression of OGT stimulated O-GlcNAc levels in Bel-7402 (transfected with 1-4  $\mu$ g of OGT-expressing plasmids) and SMMC-7721 cells (transfected with 4  $\mu$ g of OGT-expressing plasmids). The O-GlcNAc blots in the box rectangles were presented in Fig. 2d.

(h-j) O-GlcNAcylation increased YAP stability. Protein synthesis was blocked by treatment with CHX (50  $\mu$ g/ml) for the indicated times. The half-life of endogenous YAP in SMMC-7721 cells treated with DMSO (h) or PuGNAc (25  $\mu$ M, i) with or without GlcNAc (4 mM, j) for 24 h. The YAP blots in the box rectangles were presented in Fig. 3a.

(k-m) OGT reversed  $\beta$ TrCP-induced YAP degradation in Bel-7402 cells. YAP (k), OGT-Myc (l) and  $\beta$ TrCP-Flag (m) expressions were examined with  $\beta$ TrCP overexpressed in the presence or absence of transfection with an increasing amount of OGT-Myc plasmid (transfected with 1–3  $\mu$ g of OGT-Myc-expressing plasmids). The YAP (k), OGT-Myc (l) and  $\beta$ TrCP-Flag (m) blots in the box rectangles were presented in Fig. 3c.

(n-p) OGT reversed  $\beta$ TrCP-induced YAP degradation in SMMC-7721 cells. YAP (n), OGT-Myc (o) and  $\beta$ TrCP-Flag (p) expressions were examined with  $\beta$ TrCP overexpressed in the presence or absence of transfection with an increasing amount of OGT-Myc plasmid (transfected with 1–3  $\mu$ g of OGT-Myc-expressing plasmids). The YAP (n), OGT-Myc (o) and  $\beta$ TrCP-Flag (p) blots in the box rectangles were presented in Fig. 3c.

(q-r) Mutation of Thr241 induced LATS1-YAP binding under stimulation of O-GlcNAcylation by combined treatment of GlcNAc (4 mM) and PuGNAc (25  $\mu$ M). Expression plasmids for YAP-FLAG, WT or T241A were transfected into Bel-7402 and SMMC-7721 cells, and cells were treated as indicated for 24 h before analysis. YAP-FLAG was immunoprecipitated with anti-FLAG antibodies, and the association with LATS1 was measured in Bel-7402 (q) and SMMC-7721 cells (r). The LATS1 blots in the box rectangles were presented in Fig. 5d.

(s) Glucose stimulated O-GlcNAcylation of YAP at Thr241. Bel-7402 cells were transfected with WT and T241A YAP-FLAG, and cells were treated with glucose at the indicated final concentration for 24 h. Exogenous WT or T241A YAP-FLAG was immunoprecipitated with

anti-FLAG antibodies, and O-GlcNAcylation was measured by western blot using an anti-O-GlcNAc antibody. The O-GlcNAc blot in the box rectangles was presented in Fig. 6c.

(t-u) YAP stimulated O-GlcNAcylation. O-GlcNAcylation was analyzed by WB in Bel-7402 (t) or SMMC-7721 cells (u) with YAP knocked down. The O-GlcNAc blots in the box rectangles were presented in Fig. 7d.

(v-w) Stimulation of O-GlcNAcylation was dependent on YAP. Bel-7402 cells with YAP knocked down were treated with DMSO, PuGNac (to a final concentration of 25  $\mu$ M) with GlcNAc (to a final concentration of 4 mM) for 24 h before being harvested to test the O-GlcNAc level using WB (v). O-GlcNAc level was also tested by WB in Bel-7402 cells with YAP knocked down after treatment with the indicated concentration of glucose for 24 h (w). The O-GlcNAc blots in the box rectangles were presented in Fig. 7e.

(x) O-GlcNAcylation of YAP Thr241 in liver cancer and adjacent normal liver tissues.

Endogenous YAP was immunoprecipitated by an anti-YAP antibody in liver cancer and its paired adjacent normal liver tissue. Co-immunoprecipitation of O-GlcNAc was analyzed using an anti-O-T241-YAP antibody. The O-T241-YAP blot in the box rectangles was presented in Supplementary Fig. 8d.

(y-z) O-GlcNAc levels in liver cancer tissues from patients complicated with diabetes or not were detected using WB. The O-GlcNAc (y) and GAPDH (z) blots in the box rectangles were presented in Supplementary Fig. 9o.

**Supplementary Table 1. Intracellular metabolites that regulated by YAP in Bel-7402 and SMMC-7721 cells.**

| Metabolites                    | Bel-7402         |                    |                     |                     | SMMC-7721        |                    |                    |                    |
|--------------------------------|------------------|--------------------|---------------------|---------------------|------------------|--------------------|--------------------|--------------------|
|                                | Mock             | YAP                |                     |                     | Mock             | YAP                |                    |                    |
|                                |                  | O/V                | sh1                 | sh2                 |                  | O/V                | sh1                | sh2                |
| Lactic acid ( $\mu\text{M}$ )  | 75.50 $\pm$ 3.38 | 29.33 $\pm$ 1.39 * | 128.57 $\pm$ 0.60 * | 110.32 $\pm$ 1.19 * | 56.61 $\pm$ 2.68 | 16.25 $\pm$ 1.59 * | 97.33 $\pm$ 0.50 * | 83.15 $\pm$ 0.69 * |
| Glutamine (mM)                 | 11.93 $\pm$ 0.23 | 22.47 $\pm$ 0.95 * | 4.78 $\pm$ 0.61 **  | 6.10 $\pm$ 0.89 *   | 8.96 $\pm$ 1.83  | 16.87 $\pm$ 0.70 * | 3.60 $\pm$ 0.26 ** | 4.15 $\pm$ 0.05 *  |
| Glutamic acid (mM)             | 2.19 $\pm$ 0.04  | 1.30 $\pm$ 0.03 *  | 3.03 $\pm$ 0.02 **  | 3.19 $\pm$ 0.02 **  | 1.55 $\pm$ 0.05  | 1.07 $\pm$ 0.07 *  | 2.36 $\pm$ 0.11 *  | 2.38 $\pm$ 0.02 *  |
| Acetyl-CoA ( $\mu\text{M}$ )   | 2.06 $\pm$ 0.02  | 6.21 $\pm$ 0.02 ** | 0.49 $\pm$ 0.02 **  | 0.51 $\pm$ 0.01 **  | 1.39 $\pm$ 0.02  | 4.25 $\pm$ 0.01 ** | 0.29 $\pm$ 0.01 ** | 0.33 $\pm$ 0.02 ** |
| Fructose-6-P ( $\mu\text{M}$ ) | 5.96 $\pm$ 0.45  | 14.80 $\pm$ 0.35** | 1.99 $\pm$ 0.03 *   | 1.89 $\pm$ 0.07 *   | 4.06 $\pm$ 0.37  | 10.00 $\pm$ 0.35 * | 1.20 $\pm$ 0.05 *  | 1.31 $\pm$ 0.13 *  |
| Glycogen (mg/l)                | 35.90 $\pm$ 1.47 | 33.01 $\pm$ 3.71   | 32.46 $\pm$ 2.63    | 36.51 $\pm$ 0.77    | 23.50 $\pm$ 0.20 | 21.85 $\pm$ 1.08   | 19.99 $\pm$ 0.15   | 19.88 $\pm$ 1.55   |

\*,  $p < 0.05$ , and \*\*,  $p < 0.01$  versus Mock as analyzed by a one-way ANOVA test. Intracellular metabolites were measured in Bel-7402 and SMMC-7721 cells with or without YAP overexpressed (O/V) or knocked down by sh1/2. The data indicated the concentration of metabolites of cell lysates generated by adding 100  $\mu\text{l}$  lysis buffer into  $1.25 \times 10^6$  cells.
